# Supplementary material
Source: HighWire-hosted journal article supplement (https://jnnp.bmj.com/content/89/9/970)
Supplement: inline-supplementary-material-2 [file inline-supplementary-material-2.xlsx]

## Sheet: Elevida data PLoS Med.xls
lfdn	Group (1=Elevida, 2=WLC)	Age	year_of_diagnosis	educationyears	sex	chalder_baseline	chalder_wk12	Chalder_wk24	HADS_A_baseline	HADS_A_wk12	HADS_A_wk24	HADS_D_baseline	HADS_D_wk12	HADS_D_wk24	MSNQ_baseline	MSNQ_wk12	MSNQ_wk24	FSMC_baseline	FSMC_wk12	FSMC_wk24	FSMC_kog_baseline	FSMC_mot_baseline	FSMC_kog_wk12	FSMC_mot_wk12	FSMC_kog_wk24	FSMC_mot_wk24	HALEMS_fatigue_baseline	HALEMS_fatigue_wk12	HALEMS_fatigue_wk24	HALEMS_thinking_baseline	HALEMS_thinking_wk12	HALEMS_thinking_wk24	HALEMS_lower_baseline	HALEMS_lower_wk12	HALEMS_lower_wk24	HALEMS_upper_baseline	HALEMS_upper_wk12	HALEMS_upper_wk24	HALEMS_communication_baseline	HALEMS_communication_wk12	HALEMS_communication_wk24	HALEMS_mood_baseline	HALEMS_mood_wk12	HALEMS_mood_wk24	FAI_baseline	FAI_wk12	FAI_wk24	immune_therapy	modified_ITT
22	1	58	30	17	2	25	24	21	11	8	4	8	5	5	19	45	43	83	77	72	40	43	37	40	34	38	3.5	3.75	4	2.75	3.5	3.5	4.25	4.25	3.5	3	3.8	2.8	3.5	3.66667	3	3.2	1.8	3.2	29	33	33	11	0
42	1	27	3	12	1	21	20	16	11	7	11	7	9	9	35	39	48	71	83	81	31	40	40	43	40	41	4.25	3.75	3.75	4	3.5	3.75	2.75	1.5	2.5	1.2	2	1.4	2.33333	1.66667	2.5	4	3.6	3.8	30	32	31	6	0
83	1	47	10	17	1	16	14	22	1	0	0	7	4	3	14	31	30	67	70	72	27	40	27	43	30	42	2.25	2.5	2.75	2.5	2	2	3.75	4	5	1.4	1.2	2	1.16667	1.16667	1.16667	2	1.8	1.8	33	36	28	8	0
7	1	47	6	13	2	33	23	23	8	6	7	10	10	11	36	47	41	98	85	85	49	49	42	43	44	41	5	4.25	4.25	4.75	4.25	4	3.75	3	3.5	3	1.4	2.2	1.83333	1.66667	1.83333	2.4	2.4	2.8	32	31	26	14	1
24	1	56	10	18	1	17	9	18	5	1	2	8	4	8	2	18	23	72	66	74	29	43	28	38	36	38	3.25	2.5	3.5	1.5	1.5	1.75	2.75	3	3	1.8	1.8	1.8	3.16667	1.66667	2.5	1	1.2	1.8	23	29	20	4	1
26	2	42	6	12	1	19	11	12	5	6	9	3	2	2	19	31	36	60	59	61	29	31	25	34	27	34	2.75	2.75	2.5	2	2.75	2.25	2.25	2.5	2	1	1.2	1.4	2.33333	1.66667	1.16667	2.4	2	2.4	40	50	44	12	1
27	2	36	7	17	1	19	20	17	8	8	8	6	4	5	4	18	19	74	66	54	29	45	26	40	20	34	4.25	3.75	3.25	1.5	2	1.5	3	3	2.75	1.8	2	1.6	4	3.83333	4	2	2.2	1.6	31	28	35	1	1
34	2	51	13	12	2	18	14	11	5	2	2	1	2	1	23	21	24	66	54	55	34	32	24	30	27	28	2.5	1.5	2	2.5	1.25	1.75	2.5	1.5	2.25	2	1.2	1.2	2.16667	1.16667	2.16667	3.6	1	3.4	30	33	15	3	1
37	2	61	1	14	2	18	18	15	3	4	3	3	3	3	15	29	33	68	61	63	29	39	25	36	30	33	2.25	3	2.25	1.5	2	2.5	2.75	3.25	3	1.4	1.4	1.6	1.5	1.66667	1.83333	2.2	1.8	1.8	40	43	30	4	1
44	2	50	10	17	2	22			6			6			28			81			37	44					3.75			3.25			3.5			1.8			1.5			2.4			34			12	1
47	2	60	15	16	1	22	15	14	1	0	0	2	1	0	7	23	22	67	55	56	32	35	23	32	28	28	2.75	2.5	2.25	1.75	1.75	1.5	4.5	4.25	4.75	2.6	2	1.8	2.66667	1.83333	2.16667	1.8	1.4	1.6	30	23	30	4	1
59	1	44	3	12	2	17	10	10	13	10	9	5	3	3	18	41	33	72	75	55	34	38	37	38	24	31	3	3.25	1.75	2.25	3	2	1	1.25	1	1	1	1	1.83333	2.33333	2.33333	2.2	2.4	2	46	40	38	2	1
75	1	55	28	13	1	16	11	11	7	7	11	7	5	7	17	33	45	63	67	60	31	32	31	36	30	30	3	3.25	3	2.5	2.5	3	2	2.25	3	1.4	1.2	3	3.5	3.66667	3	2.6	2.4	3	39	45	41	4	1
80	1	46	6	12	1	22	4	7	1	0	2	2	1	1	12	27	33	76	62	66	39	37	30	32	31	35	3.25	2.5	2.5	2	1.25	1.25	2	1.5	2	1.2	1	1	2.33333	1	1	1	1	1.2	49	47	46	14	1
94	1	47	6	13	1	30	20	14	7	6	7	10	7	12	43	55	54	93	89	96	47	46	46	43	48	48	5	4.25	3.5	4.75	4.5	5	3	3.25	3.5	3.6	2.2	3	3.83333	3.5	4	2.6	2	3	19	19	28	1	1
102	2	48	25	16	2	16	15	15	1	2	3	4	3	2	7	21	24	70	62	48	24	46	24	38	14	34	2.75	2.75	2.75	2.25	1	1.5	4.5	4.5	4	2.6	2.6	2.4	2.33333	1	2.5	4.2	1.8	3.6	33	36	39	16	1
103	2	18	9	15	2	20	17	21	5	4	4	3	5	4	13	24	25	76	79	74	31	45	33	46	31	43	3.5	4	3.5	2	2	2	4.25	5	5	3.4	3	3.6	1.83333	2	2	1.6	1.4	1.6	21	22	21	1	1
106	1	32	8	16	1	18	6	11	4	4	3	1	1	1	8	22	21	66	50	76	33	33	23	27	35	41	3	1.25	1.75	1	1	2.25	1	1	1.25	1	1.2	1.2	1	1	1	1.4	1.2	1.4	33	49	49	16	1
107	2	50	1	17	1	22	17	22	9	8	12	5	6	6	29	37	48	75	69	78	38	37	33	36	39	39	2.5	2.5	3.5	3.75	3.25	4.5	2	2	3.25	1.4	1.6	2.4	2.33333	2.83333	3	2.4	2.4	2.6	38	37	27	3	1
111	1	49	15	13	1	17	14	11	7	7	5	2	2	2	24	44	37	51	61	55	25	26	31	30	27	28	2.75	2.75	2.25	2.25	3.25	2.25	2	2.25	2.25	1.4	1	1.4	1.5	1.5	1.33333	1.4	1.8	1.6	50	48	48	3	1
122	1	41	6	18	1	15		8	5		3	6		6	13		25	66		62	32	34			29	33	3.25		2.5	2.75		2.75	3.25		2.75	1.4		1.6	1.16667		1.16667	2.6		2.4	36		33	12	1
125	2	50	15	16	2	17	20	18	3	4	6	4	4	5	10	24	36	72	71	72	35	37	33	38	35	37	2.5	2.75	3	2.25	3	2.75	4.5	5	5	3.6	4.4	3.6	1.33333	1.5	1.5	2.8	2.2	3	26	15	13	1	1
127	2	30	3	13	1	26	22	28	6	6	4	6	8	9	35	51	50	92	94	88	46	46	47	47	44	44	4.25	4	4.5	4	3.75	3.25	1	1	2.25	1.4	1.4	1.4	4.16667	2.83333	3.16667	3.4	3.6	3.8	23	21	27	3	1
130	1	53	18	13	1	15	11	21	7	6	8	7	7	8	37	48	52	94	92	96	47	47	46	46	49	47	3.5	3	3.75	4.25	3.75	4.75	2	1.75	2	2.2	2.2	2	2	2.16667	2	1.6	2.2	2	38	41	37	4	1
132	1	50	8	15	1	14	9	8	5	3	9	5	5	6	8	23	28	57	54	57	23	34	23	31	25	32	1.75	1.5	2.25	2.25	2	2.5	2.5	1.5	2.5	1.2	1.2	1.2	3.16667	2.83333	3.16667	3.4	2	2.6	39	39	37	8	1
133	2	49	8	16	1	28	22	25	2	2	10	4	2	6	20	34	33	90	91	90	43	47	45	46	43	47	4.75	4	4.75	3.75	3.25	4.5	1.75	1.5	1.5	1.4	1.8	1.6	1.16667	1.33333	1.16667	1.2	1.4	2.2	38	35	36	4	1
135	1	38	3	13	1	27	24	27	3	2	5	1	2	4	17	39	45	66	67	68	28	38	32	35	33	35	3	2.75	3.75	2	2.25	3.5	2.75	2.5	3.5	1.2	1.2	2.2	1.83333	1.83333	2	1.8	1.4	1.4	29	34	36	12	1
149	1	57	19	18	1	21	5	5	12	5	6	5	1	2	31	31	38	91	66	69	46	45	31	35	33	36	4.5	1.75	1.75	3.75	1.75	2.25	5	4	4	3.4	2.6	2.4	1.33333	1.33333	1.5	2.6	1.2	1.2	22	34	30	1	1
153	2	43	15	18	1	11	15		7	8		4	2		23	31		81	70		43	38	37	33			3.75	3		3.5	3		1.25	1.5		1	1.2		1.5	1.66667		1.8	2.2		42	29		16	1
157	1	41	13	16	2	8	9	8	4	2	3	9	8	7	18	28	23	90	86	80	42	48	39	47	34	46	3.25	3.25	2	2.5	2.5	3	5	5	5	3.2	3.8	3.4	2.66667	1.83333	1.66667	2	2.2	2.6	21	21	14	1	1
166	2	60	23	16	2	25	11	11	0	3	2	3	3	2	27	42	43	74	71	67	32	42	34	37	32	35	4.25	3.5	3.5	3.25	3.5	3.25	3.5	3.75	2.75	1.4	1.8	1.4	1	1.16667	1.33333	1.4	2	2	35	41	33	16	1
168	2	56	38	16	1	15	16	13	12	12	10	5	7	5	38	59	47	81	78	91	43	38	40	38	45	46	4	4	4	4.25	4.25	4.5	2	1.75	1.5	1.2	1.2	1.4	2.5	2.66667	1.83333	2.2	2.4	1.4	34	35	48	10	1
174	1	41	15	17	1	23	9	12	6	7	5	4	2	1	22	41	40	85	67	70	41	44	34	33	35	35	3.25	1.75	2	4	2.75	2	3.5	2.25	2.5	2	1.6	1.4	1.33333	1.16667	1	1.6	1.4	1.2	38	37	39	1	1
176	2	53	2	16	1	28	27		15	13		18	19		31	63		98	95		49	49	48	47			4.75	4.5		4.75	5		2.75	2.5		1.4	1.8		3.5	2.83333		4.6	4.6		24	14		16	1
181	2	45	16	17	1	22	16	16	8	9	4	5	5	6	26	51	56	75	76	72	38	37	39	37	40	32	3.75	3.5	3.75	3.25	4.25	4.25	2.5	3	3	2	2	2	1.33333	2	1	2.6	2.4	2.2	39	27	30	12	1
182	2	36	1	13	1	25	27	22	6	9	9	5	6	5	21	43	37	76	70	74	39	37	35	35	38	36	3.75	3.75	3.5	4	4	3.75	1	2.5	2.5	1	1.2	1.2	1	1	1.33333	2.4	3	2.8	50	43	39	4	1
183	1	18	27	18	1	21	9	12	6	5	5	11	8	13	18	29	33	74	55	43	39	35	26	29	20	23	2.75	1.75	1.75	2.5	2	2.25	2.25	1.75	2.25	2.6	1.8	2.2	2.33333	2	2.66667	2.6	2.8	4	35	35	28	1	1
209	1	25	7	16	2	23			7			7			36			69			36	33					3.25			4			2.25			1.2			1.83333			3.2			26			16	1
212	1	52	2	13	1	23	6	5	13	8	9	11	10	6	20	35	35	73	73	53	35	38	34	39	23	30	3.5	2.25	2.25	3.25	2.25	2.25	3.25	3	2.75	2.4	1.6	1.8	4.16667	3.66667	3.16667	3.4	2.6	2.6	35	38	41	1	1
214	1	67	23	18	2	23	22		7	5		9	7		9	24		68	57		31	37	25	32			2.75	3		2	2.5		4	4.25		1.4	1.8		1.5	1.83333		2.4	2.2		19	20		2	1
227	2	36	2	13	1	22	26	20	8	10	8	9	5	5	38	56	51	92	97	94	47	45	47	50	48	46	4.75	4.5	4.75	5	4.75	4.75	2.5	2.5	2	1.6	1	1	3	2.66667	2	3	2	2.2	31	32	35	10	1
230	2	46	6	13	1	21	18	12	4	6	5	2	1	1	27	35	34	79	65	62	45	34	39	26	36	26	2.5	2.75	2.75	4.5	4.5	4	1	1	1	1	1	1	1.66667	1.33333	1.5	1.6	1.6	1.6	46	48	48	1	1
232	2	49	13	16	1	18	15	15	4	6	5	3	8	6	33	50	41	79	88	87	38	41	43	45	42	45	3.5	3.75	3.25	3.5	4	3.25	2.5	4.25	3.5	2.6	3	2.6	2	2.5	2	2	3.4	3	15	12	19	1	1
234	1	53	27	12	1	15	11	15	0	4	1	2	2	6	12	29	32	55	57	49	24	31	24	33	23	26	2	2.75	3	1.5	2	1.5	5	4.5	5	2.6	1.4	1.8	1.16667	1.33333	1.16667	1.2	1.6	1.8	24	35	36	1	1
240	1	35	5	15	1	13	13	9	12	10	11	5	3	4	19	30	33	64	52	61	33	31	26	26	31	30	3.5	3	2.75	3.25	2.75	3.5	1.75	1.25	1.25	1.2	1.2	1.2	1.33333	1.66667	1.5	2.4	2.4	2.2	43	38	42	12	1
254	1	49	4	16	2	21	6	9	6	1	2	12	6	6	28	32	33	82	67	75	33	49	25	42	28	47	4.5	3.5	3.25	2.25	2.5	2.25	4.75	4.5	4.75	4.2	3.8	4.2	2.83333	2.16667	3.33333	3.8	1.8	2.6	21	31	22	1	1
255	2	48	8	13	1	22	14	4	4	4	3	5	6	1	25	40	40	89	91	74	42	47	46	45	35	39	4.25	4.75	3.75	3.75	3	2.75	1	1	1	1	1	1	2.16667	2.16667	1.33333	1.8	1.4	1.8	40	38	44	10	1
256	2	18	4	13	1	19	20	12	11	7	11	10	8	12	41	42	41	78	80	68	37	41	38	42	32	36	2.25	2.75	2.75	2.25	2.5	3	2.25	2.25	2.25	1.2	1.2	1.4	1.66667	2.33333	2.66667	1.8	2.2	2.8	29	28	31	10	1
262	1	53	1	16	1	23	13	21	10	14	13	11	17	12	16	30	33	67	58	56	29	38	26	32	26	30	3.25	2.75	2	3	2	2	2.25	2.25	2	1.4	2.8	1.8	3.66667	4	3.33333	3	3.6	2.8	24	27	38	8	1
268	2	50	22	13	2	26	27	13	2	4	2	7	6	2	31	31	31	90	67	66	44	46	32	35	32	34	4.25	3.75	3	3.5	2.5	2.75	3.5	3.25	3.5	1	1	1.2	1	2.16667	1	2.2	2.4	1.4	34	31	36	1	1
270	1	18	4	18	1	24	19	19	15	11	10	7	16	9	27	43	40	83	78	80	41	42	41	37	38	42	3.25	3.5	4	4.25	4.25	4	1.5	2.5	2.5	1.4	1.4	1.4	3.16667	3.33333	3	3.2	4.2	3.8	38	45	39	1	1
300	2	41	4	18	1	21	10	20	7	7	8	3	4	4	24	41	38	81	81	83	39	42	38	43	38	45	4	3.5	4	2.75	2.5	3	2.25	2	2	1.6	1.6	2	1.5	2.16667	2.66667	1.8	1.8	2	30	30	26	16	1
302	2	49	19	14	1	23	22	20	12	10	9	8	6	5	25	34	38	77	75	71	35	42	34	41	32	39	4	4	2.75	2.75	2.5	2.5	2	2	2.5	1.8	1.6	2	2.33333	1.83333	2.16667	1.4	1.6	1.6	37	35	40	1	1
307	2	47	16	14	1	21	23	14	8	10	7	7	5	5	35	47	44	58	68	62	30	28	37	31	32	30	3	3.25	3.25	4.5	4.5	4	1.75	1.25	1.5	1	1.2	1.2	1.5	1	2.16667	1.8	2	2	38	44	41	4	1
310	1	46	2	13	2	20	18	15	5	7	5	4	6	2	7	28	28	66	55	61	30	36	26	29	29	32	3.75	3	3.75	1.75	2	1.5	3	3.75	3	1.6	1.2	1.6	2	1.33333	1.5	1.8	1.2	1.2	33	41	34	2	1
343	1	42	15	16	2	17	6	11	9	7	5	1	1	1	13	28	25	48	52	46	25	23	26	26	23	23	2.75	1.75	1.25	2	2.25	1.5	1	1	1	1.4	1	1	1.66667	1.66667	1.5	2	2	1.4	37	38	38	1	1
345	2	27	2	16	2	24	22	11	14	11	7	10	9	6	34	39	28	73	59	64	34	39	32	27	28	36	3.75	3.75	3	3.5	3.25	1.5	3.75	3.5	2.75	1.4	2.2	1.6	2.83333	2.83333	3.16667	4.4	3.6	3	18	22	32	4	1
347	2	44	6	16	1	18	15		7	6		4	3		7	29		65	58		29	36	24	34			2.25	2.5		2	1.75		4.5	4		1.6	1.6		2.5	1		1.8	2.2		40	41		8	1
348	1	37	2	13	1	22	22	18	6	5	7	3	3	4	19	33	32	56	59	70	31	25	31	28	38	32	2.5	3.25	3	2.5	3	2.5	2.5	1.5	1.5	1.6	1.6	1.2	1.66667	1.33333	1.83333	2.8	2.4	2.2	38	46	44	2	1
351	2	37	13	13	1	21			13			4			42			83			44	39					4.25			4.25			1.25			1.4			2.16667			2.2			45			8	1
358	2	48	11	13	1	20	11	11	9	8	9	11	9	10	32	53	50	83	82	74	40	43	40	42	38	36	4.25	4.75	4.5	4.25	4.5	4.25	3.25	3.5	2.5	1.8	2.2	2	2.16667	2.66667	2.66667	3.8	3.2	3.6	39	38	42	4	1
363	2	39	0.5	18	2	26	20	19	4	6	6	4	1	1	28	42	38	74	70	61	38	36	35	35	33	28	3.75	2.5	3.5	2.25	2.25	3	2	2.25	2.25	1.2	1	1	1.33333	1.33333	2.5	1.2	1.6	1	35	39	32	1	1
376	1	52	15	16	2	14	7	11	8	4	3	12	9	2	32	26	39	68	62	53	36	32	33	29	28	25	3.75	2.75	1.75	4	4	2.25	1.5	1.25	1	1.8	1.6	1.2	2.5	2.66667	2	3.6	2	2	32	28	29	3	1
378	2	33	10	13	1	22		21	10		8	7		7	24		51	73		79	40	33			41	38	4.25		4	3.5		4	1.75		1.5	2.6		1.2	3.66667		2.66667	2.6		2.8	24		20	8	1
389	2	36	7	13	1	26	12	15	13	9	13	10	6	6	33	47	54	86	80	87	44	42	43	37	47	40	4	4	4.25	4.25	4.5	4.5	1.5	1.75	2.75	1.6	2.2	2.2	1.16667	1.33333	1.5	3	3	3.2	32	23	31	10	1
395	1	43	10	13	1	17	9	18	4	4	3	8	7	7	28	36	38	68	65	68	35	33	33	32	36	32	4	2.5	2.5	3	3	2.75	1.75	1.75	1.25	2	1.4	1.2	3.16667	2.33333	2.16667	3.6	2.8	3	34	35	42	12	1
397	2	42	4	18	2	16	20	23	11	9	13	7	3	5	31	48	48	87	80	82	42	45	42	38	42	40	3.75	4	4.5	4	4	4	3.25	2.25	2.5	1.8	1.2	1.4	3.16667	1.83333	3	2.6	2.2	2.2	22	29	25	2	1
400	2	37	3	13	1	6	19	8	5	5	4	2	4	3	13	32	31	52	61	60	23	29	29	32	29	31	2	4.25	2.75	1.75	3.75	2	1	1.5	1	1	1.4	1.2	1.66667	1.66667	2.33333	1	1.6	1.4	45	47	45	2	1
404	2	38	2	14	1	11	25	16	10	14	12	10	13	15	15	38	32	67	65	65	41	26	39	26	39	26	2.5	2.75	2.5	3	3	2.75	1	1	1	1.2	1.2	1	3.83333	4	4.5	2.6	2.8	4	43	43	40	2	1
416	2	30	0.5	18	1	30	17	26	6	8	5	14	8	7	38	53	46	83	85	84	44	39	43	42	40	44	4	4.5	3.5	4.5	4.25	4	1	4	1.5	1.2	2.2	2.2	2.16667	2.33333	2	3.2	2.8	1.6	33	34	33	8	1
417	2	30	9	16	1	16	20	19	7	6	6	11	9	12	20	37	35	61	64	70	25	36	29	35	30	40	3.25	3.5	4	1.75	2	2.5	3.25	2.75	3	2.2	1.2	1.6	1.66667	1.5	2.5	2.6	2.8	3.6	33	24	22	8	1
423	1	35	1	15	1	17	8		11			9			29			75			36	39					4			2.5			2.5			2.6			3.33333			3.4			21			10	1
426	2	40	11	13	2	18	22	24	3	4	9	3	4	6	4	29	25	85	89	96	41	44	45	44	48	48	3	4	4	2.5	2.5	3.5	2.25	2.25	2.25	1.4	2.8	2.4	3.33333	2.83333	2.5	1.4	1.4	1.6	27	17	18	12	1
437	2	49	3	13	1	22	12	12	8	9	6	10	12	9	22	40	43	63	63	77	34	29	31	32	38	39	4	3.5	3.5	3.5	2.25	2	1.5	1.5	2.5	1	1.2	1.2	3.33333	3.33333	3.66667	3.2	2.8	3	47	42	39	0	1
440	2	22	5	15	1	12	20	10	7	8	5	0	1	2	15	30	44	56	70	75	26	30	34	36	40	35	3	3	3.75	2.5	2.5	4	1.5	2.5	1.5	1	1.4	1	2.83333	2.5	2.66667	1.2	1.2	1.4	44	42	41	1	1
448	2	43	10	16	1	15	11	4	11	9	7	10	6	9	25	37	33	76	69	70	33	43	30	39	31	39	4	3.5	3.75	2.5	2.25	1.75	2.25	2.25	1.5	1.6	1.6	1.6	3.33333	3	3.16667	3.4	2.6	3.2	39	37	35	10	1
457	1	61	14	18	1	21	20	17	1	2	1	2	3	1	26	31	26	81	67	62	36	45	32	35	26	36	3.75	2.75	3.25	3.25	2.75	2	4	3.5	3.5	3	2.2	2.2	1.33333	1.16667	1.33333	1.2	1.4	1.2	35	38	39	4	1
463	1	35	1	18	1	12	21	13	13	7	10	6	7	6	27	42	39	76	64	61	36	40	33	31	30	31	3.25	3	3.25	3	2.75	2.75	2	1.75	2.5	1.6	1.6	1.4	2.66667	2	3	2.4	1.8	2.6	28	36	32	6	1
482	1	43	5	13	1	26	29	30	10	11	13	15	16	17	43	66	70	96	98	98	48	48	49	49	49	49	4.75	4.75	4.75	4.5	4.75	5	3.75	4	4.5	3.2	4.2	4.2	4.33333	4.33333	4.5	3.8	3.6	4.2	28	23	29	3	1
483	1	48	1	13	1	33	32	33	13	18	16	16	17	15	50	66	62	96	98	96	49	47	49	49	47	49	5	4	5	5	5	4.75	4.75	4	4	2.8	1.8	3	3.83333	4.66667	4.16667	3.8	3.6	3.6	14	11	18	10	1
489	1	37	10	16	1	20	11		7	3		6	4		22	29		61	57		16	45	11	46			3.25	3		1.5	1		4.5	4.5		2.2	2.2		3.83333	3.5		2	2.2		17	19		10	1
492	2	35	2	13	1	28	32	16	16	15	12	8	12	10	45	67	54	88	97	88	48	40	50	47	45	43	3.75	5	3.5	5	5	4.75	2	4.75	2	1.2	2.2	2	2.83333	4.33333	4.16667	3.2	4.2	4.2	28	21	23	4	1
509	1	52	15	13	1	30	7	9	5	6	8	9	7	10	43	61	56	92	92	89	45	47	47	45	47	42	4	4.25	4	4	5	4	5	4	4.25	4	3.8	2.8	2.33333	2.66667	2.66667	3	2	2.4	20	17	19	1	1
514	1	18	0.5	13	2	26	13	20	0	1	0	2	2	6	23	32	51	87	87	92	43	44	44	43	44	48	4.25	4.5	4.25	3.5	4	4.25	1.5	1.75	2	1	1.2	1.4	1.66667	1.33333	2.5	1.2	1	2	26	35	26	8	1
528	2	43	14	16	1	23	18	22	9	9	10	11	9	10	23	40	39	74	77	74	38	36	38	39	36	38	3.5	3.5	3.75	4.5	3.25	3.5	2.25	3	3	1.2	1.6	2	1.33333	2.5	2.5	2.8	2.8	3.6	34	35	32	4	1
531	2	32	3	16	1	19	24	16	15	13	17	5	4	5	44	54	45	76	76	70	40	36	39	37	35	35	3.25	3.5	3.5	3.75	4.25	4.25	1.5	2	1.25	2	1.2	1	1.5	1.16667	2.16667	2.8	2.4	2.6	45	33	47	12	1
6	1	49	32	18	1	26	32		14	14		16	16		18	32		72	85		27	45	38	47			4.25	4.5		2.5	3		5	5		4.8	4.4		4.16667	4.33333		4	4.4		42	48		1	0
8	1	44	17	11	2	20	21	19	5	7	5	3	4	5	19	36	37	70	82	71	32	38	39	43	35	36	3.75	3.5	3.5	2	2.25	2.25	1.25	2	1.25	1	1.4	1	1.16667	2	1.16667	2	2.8	2.8	33	35	34	4	0
185	1	44	1	17	1	25	23	23	10	15	13	5	6	7	35	51	48	82	80	84	43	39	39	41	42	42	3.75	4.25	4	3.75	3.75	3.5	1.5	2	1.5	1.6	1.6	1.4	2.5	2.5	2.16667	2.8	3	3.2	36	35	31	8	0
193	1	53	3	13	1	27	31	26	11	13	9	12	15	10	49	70	65	96	97	98	49	47	50	47	50	48	4.5	5	5	5	5	5	3	4	4	2.6	3.4	3.4	2.5	3.33333	1.83333	3.4	4	3.2	30	30	30	2	0
272	1	39	14	13	1	17	21		4	7		1	1		21			72	75		34	38	37	38			3.5	3.25		2.5	2.75		1.25	1.5		1.2	1.4		1.83333	1.16667		1	1		40			1	0
19	2	58	27	18	1	17	10	12	0	0	0	1	1	1	27	35	34	74	59	63	37	37	29	30	31	32	3.5	2.25	2	3.25	2.75	3	3	2.5	2.25	1.4	1.4	1.2	2.16667	2.16667	2.33333	1.4	1.2	1.2	32	33	29	4	1
21	2	36	4	16	1	22	11	11	7	8	6	2	4	1	23	41		72	75	75	37	35	39	36	38	37	2.25	3	2	2.75	2	1.75	1	1	1	1	1	1	2.33333	2.33333		1.6	1.6		39	41		16	1
25	2	53	17	13	1	23	16	18	9	10	12	11	14	11	9	24	27	71	87	74	24	47	39	48	32	42	3.5	3.75	3.25	1.75	2	1.75	3.5	4	3.75	1.8	1.8	2	2.83333	4.16667	3.5	2.8	3.8	3.8	29	24	26	2	1
29	2	41	6	18	2	10	13	4	10	11	3	7	6	1	6	21	21	63	62	57	21	42	17	45	19	38	2.5	2.25	2.25	1.25	1.5	1.5	4.25	4.25	4.75	2.6	2.8	4	1.33333	1.33333	1.33333	1.8	1.4	1.2	19	23	15	6	1
33	1	47	12	17	1	22			4			3			15			81			42	39					2.5			3			3.5			2.8			1.5			1.8			24			6	1
57	1	36	5	13	1	22	22	12	2	2	1	2	3	1	31	43	39	83	80	82	43	40	40	40	42	40	4.75	4.25	4	4.5	4.25	3.75	1.25	1	1.25	1.4	1.2	1.2	1.66667	1	1.16667	1	1	1	39	38	44	10	1
77	2	52	2	18	2	22	16	22	8	6	8	7	6	5	22	31	32	75	63	73	39	36	33	30	37	36	3.25	2.75	3.5	3.5	3	3.5	2.25	2	3	1.2	1.6	1	2.66667	2.5	2.5	2.2	3	2.8	41	47	43	10	1
85	1	36	8	18	1	20	12	14	2	2	5	2	1	1	28	33	35	79	74	65	36	43	32	42	29	36	4	4	3	3.25	3	3	2	1.5	1.75	1.2	1.2	1.2	2.5	2.16667	3	1.6	1.6	2	31	38	35	9	1
120	1	37	4	16	2	25	7	10	11	10	10	13	13	8	22	30	27	61	44	48	26	35	22	22	23	25	3.25	1.25	2	2.5	2.75	2.25	2.25	2.25	2	1.4	2.4	1.4	1.33333	2.33333	2.16667	2.6	3.6	2.6	23	27	31	4	1
124	2	18	1	13	1	11	19	20	16	15	14	11	12	14	16	37	39	51	70	76	22	29	35	35	38	38	3	4	4	2	2.5	3	1	1.25	1.25	1.2	1.6	1.4	3.16667	3.16667	4.16667	3.8	4	4.2	43	33		10	1
143	1	43	11	16	1	22			9			9			24			86			44	42					4.25			4			1.5			1.4			2.5			3.2			32			1	1
161	1	33	4	16	1	22			10			3			31			57			31	26					3.25			3.75			1			1			2.5			2.6			38			1	1
170	1	36	16	16	1	22	21	20	13	14	12	6	8	7	23	38	37	73	71	67	39	34	37	34	36	31	3	3.75	3.25	3.25	4.25	3.5	2	2.75	2.75	1.4	1.8	1.4	2.33333	3	2.83333	2.6	3.2	2.8	33	34	32	16	1
192	1	53	4	17	1	28	22		13	10		19	14		52	71		90	82		49	41	44	38			5	4.5		5	4.5		3	3.25		3.2	2.8		4.5	4.16667		4.8	3.6		24	24		8	1
215	2	45	1	18	1	25	1	19	8	7	3	5	4	2	30	37	36	69	69	69	37	32	34	35	38	31	2	1.25	2.5	3	2.25	3.75	1.25	2	1.75	1	1	1	3.33333	3	3.5	2	1.6	1	38	38	36	4	1
218	1	52	17	18	1	23	11	20	4	3	3	3	2	3	31	43	43	66	62	57	38	28	38	24	31	26	3	2	2.75	3.5	3.5	2.75	1.5	2	2	1.4	2	1.8	1.5	1.5	1.33333	1.6	1.8	2.2	29	44	40	1	1
321	2	42	12	16	1	19	6	19	10	7	12	2	2	8	20	30	36	63	62	67	23	40	26	36	29	38	3.5	2	3.5	1.75	2	2.25	2	2.25	2.25	1	1	1.2	2.33333	2.66667	3.16667	2	2.4	2.6	37	40	42	4	1
335	2	51	4	13	1	13	6	11	4	2	2	1	1	1	32	31	33	94	89	75	48	46	45	44	39	36	5	4.25	4.25	4.75	3.5	3.75	3.25	2	3.75	2.6	2	2.4	1	1	1	1.6	1.6	1.4	31	32	38	12	1
359	2	46	10	12	1	25			10			12			43			94			47	47					4.5			4.5			5			4.2			3.5			4.2			8			1	1
380	2	47	4	16	1	22	18	19	6	5	5	6	4	4	19	26	24	66	68	62	35	31	36	32	32	30	3	3	2.5	2.75	3	3.25	5	5	4.75	3	3.2	2.8	1.83333	1.5	1.16667	2.8	3.2	2	15	23	27	14	1
398	2	37	14	13	1	18	24	11	5	12	8	8	8	6	18	39	43	67	85	79	31	36	41	44	39	40	3.75	4.5	3.5	2.75	4	3.25	2.75	2.5	2.75	1.8	2	1.8	2.16667	2.33333	2.16667	1.6	2	1.6	30	36	30	6	1
418	1	34	5	15	1	28			17			15			48			98			48	50					5			4			3.75			2.4			3.5			4.6			22			12	1
427	2	18	2	12	2	14	10	9	1	3	4	3	1	3	6	21	23	53	57	52	23	30	23	34	22	30	3	2.25	2	1	1.5	1.5	2.75	3	3	1	1.2	1.2	1.16667	1.16667	1	1.2	1	1	34	41	46	2	1
453	1	26	0.5	16	1	22			9			6			25			67			28	39					2.75			2.25			3.75			1.2			3.33333			3			24			10	1
470	1	52	30	18	1	25	23	22	8	9	9	7	8	6	30	51	53	92	91	87	46	46	46	45	45	42	4.25	3.5	4.5	4	4.5	4.25	3.25	3.5	3.5	2.6	3	2.8	2.83333	3	3	2.8	3	3.6	15	17	15	1	1
484	2	45	8	13	1	31	28		3	5		6	7		29	51		84	82		41	43	42	40			3.75	3.75		4.5	4		3.75	3.5		4	4.4		1.66667	1.33333		2.4	2.2		9	16		14	1
513	1	42	0.5	18	1	22			4			4			13			66			28	38					2.75			1.5			1.25			1			1.5			1.6			43			8	1
521	1	33	7	13	1	21			10			7			44			75			38	37					4.25			4.25			2.5			1.4			2			3.2			37			10	1
524	2	37	14	17	1	29	30	9	10	12	6	7	8	4	26	51	33	85	91	80	45	40	48	43	41	39	4.25	4.5	3.75	4.5	4.25	3.75	1	1	1	1	1.4	1.2	2.66667	3.83333	2.66667	3.2	3.4	2.4	39	35	40	8	1
70	1	37	2	13	1	15			10			1			9			50			24	26					2.5			2.75			2.25			1.6			2.33333			2			46			8	0
50	1	38	2	13	1	23	19	8	5	6	8	3	4	2	23	28	34	74	68	81	36	38	23	45	36	45	2.75	2.5	2.5	2.75	2.5	2.5	1.75	2.75	1.75	1.8	3	2.6	3.66667	3.66667	3.66667	1.8	1.4	1.4	35	31	32	1	1
195	2	47	4	16	1	28	31	33	3	1	0	11	9	9	41	59	59	96	96	98	48	48	48	48	49	49	5	5	5	4.75	5	5	4.25	4	3.75	4	3.6	3	2.66667	2.83333	3.33333	2.8	1.8	2	14	24	26	1	1
204	1	26	9	13	1	20	21	25	10	8	18	6	8	10	9	16	19	95	68	82	48	47	32	36	33	49	4.25	2.75	3	1.5	1.5	2	1.75	2.25	3.25	1.2	1.2	1.4	3.5	2.83333	3	2.4	2.6	4.2	37	33	35	10	1
333	1	29	3	12	1	33			3			10			28			97			49	48					5			4.25			4.5			3.2			3.83333			4			15			12	1
334	1	24	8	13	1	28			4			9			40			77			42	35					2.5			4.5			3			1.2			2			1.8			21			1	1
370	1	36	12	13	1	23			11			12			31			83			40	43					4			4.25			4			1.4			2.66667			3.8			22			12	1
383	2	38	0.5	13	2	25	25	22	8	11	11	8	9	12	33	54	62	76	79	79	37	39	39	40	38	41	3.75	3.5	4	4.25	4.75	4.75	3	3.5	3.25	2.2	2.6	2.2	1.66667	2.16667	2.33333	3.2	3.6	4.2	26	23	22	6	1
402	2	22	2	13	1	20	21	20	8	8	7	7	3	4	31	27	35	70	49	54	33	37	27	22	29	25	3.75	3.5	2.5	3.25	3	3.25	1.5	1.75	1.75	1.2	1.4	1.2	1.66667	1	1.66667	1.8	1.2	1.6	21	27	34	6	1
422	1	24	7	10	1	20			8			4			29			71			37	34					4.25			2.5			1.5			1.6			3			2.4			25			3	1
471	2	44	7	13	1	19	17	15	4	4	6	6	7	7	17	32	25	65	51	60	30	35	25	26	27	33	2.5	2.75	3	2.25	2.25	2.5	2.75	3.25	2.5	1.4	2.2	1.2	1.5	2	1.83333	2.6	2.4	3.6	34	27	29	10	1
480	1	35	17	13	1	21	23	14	7	10	7	5	8	3	40	59	59	87	88	85	44	43	46	42	44	41	3.75	3.25	5	3.5	4	4.25	3	3	3.25	1.8	1.8	1.8	1	1	1	2.8	3.4	2	41	42	42	16	1
505	1	33	4	14	1	31			2			3			35			81			39	42					3.75			4.25			4.25			3			1.16667			1.4			32			2	1
3	1	29	4	12	1	33			9			6			60			100			50	50					5			5			5			5			2.33333			1.2			27			1	0
191	1	41	4	12	2	19	16	11	5	9	5	4	5	3	15	30	75	85	78	100	40	45	39	39	50	50	5	2.75	5	2	2	5	4	4.5	5	2	2	5	1	1.66667	3.66667	1.2	1.8	2.6	33	33	42	10	0
207	1	36	3	13	1	27			9			8			27			85			41	44					3.5			3.75			2.5			1.8			1.83333			2.2			24			1	0
221	1	27	3	13	1	33		33	11		14	9		9	32		66	98		100	48	50			50	50	5		5	4.5		5	2.75		2.25	1.8		1.2	3.83333		3.66667	2.4		3.2	30		30	8	0
242	1	44	3	14	1	25	26	25	13	15	9	11	9	7	33	55	44	95	92	92	49	46	44	48	44	48	3.5	4.75	4.25	4	3.75	3	3.75	4.25	3.5	3	3.6	2.8	4.16667	4.83333	3.66667	2	3.4	2	25	18	15	6	0
245	1	54	16	13	1	22			2			9			12			72			31	41					3			2			3.25			1.2			3.16667			2			32			1	0
4	2	49	2	18	1	25	21	15	1	3	2	3	4	3	19	36	30	86	87	89	42	44	43	44	43	46	4	3.75	3.25	3.25	3.5	3.25	4	4.25	4.25	2.6	3	2.6	1.83333	2.33333	2.16667	1.6	2.2	1.4	30	33	26	8	1
5	2	43	4	13	1	26	24	29	12	11	14	6	8	9	18	33	53	83	88	89	38	45	41	47	41	48	4	4	4.75	2.5	3.5	4	5	5	5	4.6	5	5	1.5	1.5	1.66667	3.8	3.6	4.8	12	6	3	1	1
16	1	47	5	17	1	14	12	16	9	9	8	13	12	9	13	24	26	72	60	61	34	38	26	34	26	35	3	1.75	2.5	1.5	1	1.25	3.25	3	3	1.6	1.2	1.2	4.16667	3.5	3.33333	4	4	3.4	38	36	38	1	1
20	2	51	3	16	1	25	22	24	2	3	9	5	4	7	17	33	35	92	94	92	47	45	45	49	45	47	4.5	4	3.75	4.25	3.25	3.25	3.5	3.5	1.75	2.4	2.6	3	1.16667	1.33333	1.83333	2	2.2	2.2	24	26	26	8	1
32	1	20	2	13	1	24	11	11	6	2	2	2	0	2	33	34	34	68	62	46	34	34	32	30	23	23	3.75	2	2.25	3.5	1.75	1.75	1.25	1	1.25	1	1	1	1.83333	1.5	1.5	1.2	1.2	1.4	35	32	33	8	1
35	2	55	5	13	1	25	12	13	3	3	4	6	11	9	32	54	47	59	67	57	30	29	34	33	30	27	3	2.5	3	3.25	3.5	3.5	3.25	2.5	3	2.2	3	3	3.66667	4.33333	3.83333	2	2	2.4	24	18	14	2	1
39	1	26	2	15	1	17	14	13	15	9	9	1	0	3	28	30	29	60	33	42	31	29	17	16	22	20	3.25	1.75	1.75	2.75	1.5	1.75	1	1	1	1	1	1	1.33333	2.33333	1.16667	1.8	1.8	1.4	45	47	46	3	1
41	2	50	17	12	2	20		11	5		8	10		10	24		44	93		97	44	49			48	49	4.75		4	3.25		4	4.25		4.25	4.2		4.6	3.5		2.83333	3.2		4	1		5	1	1
52	2	41	14	16	1	18	18	29	10	9	11	10	5	8	20	31	39	72	78	77	31	41	35	43	35	42	3.75	4	4.25	2.5	2.75	2.75	2.5	2.5	2.25	1.8	1.8	2.2	1.66667	1.33333	2	2.4	1.8	2.6	33	39	34	12	1
54	2	43	22	12	1	29	20	27	9	12	16	12	21	21	34	55	65	95	99	100	47	48	49	50	50	50	4.25	4	5	4.25	4	5	2.25	2.75	4.25	1.6	1.6	2.4	4	3.83333	4.66667	4.4	4.6	2.6	30	29	27	1	1
60	1	39	4	14	1	31	31	19	11	12	14	3	7	4	36	52	55	82	72	73	43	39	35	37	36	37	5	4.75	4.5	4.75	4.5	4.25	2.25	3	3.5	1.8	2.4	2	1.83333	2.66667	3.33333	1.6	2.8	2.4	41	43	41	1	1
63	2	31	2	18	1	16	13	24	9	11	13	9	11	13	34	52	49	90	87	89	45	45	41	46	42	47	4.75	4.5	4.5	4	4	4.25	3	2.75	3.5	1.8	2	2	3	3.5	3.33333	3.6	3.4	4.4	34	34	29	15	1
64	1	35	12	16	1	18	16	19	7	8	12	2	4	5	21	41	40	71	70	71	39	32	38	32	37	34	3.25	2.75	3.25	3.5	3.75	3.75	1.75	1.5	1.75	1.2	1	1.4	1	1.83333	1.66667	2	2.8	2.2	40	38	40	6	1
66	2	44	16	13	1	26	24	22	9	9	9	7	9	8	23	39	48	75	64	70	39	36	33	31	37	33	3.75	3.25	3.25	4	3.5	4	2.25	1.5	2.5	1.8	1.6	3	2.66667	3	2.66667	2.6	2.2	3	36	35	32	12	1
69	2	53	10	16	1	23	19	19	10	9	13	11	9	12	33	52	51	71	73	73	33	38	37	36	39	34	4.25	4.5	4	3.5	4.5	4	3.25	2.75	3.25	2.8	2.4	2.2	2.83333	3.16667	3	4	3.6	4	23	24	28	8	1
71	1	48	3	14	1	21	10	8	5	4	5	6	4	3	31	37	33	80	77	67	42	38	35	42	34	33	4	3	2.25	3.75	3	2	3.5	3.25	4.25	4	4.2	4.4	2.5	3	1.16667	1.4	1.2	3.4	28	24	36	8	1
72	2	49	14	13	1	21	25	22	5	2	4	3	3	6	23	25	25	80	78	87	34	46	36	42	40	47	4.75	4.25	4	3.5	2.5	3	1.25	2.75	1	1.2	2.2	2	2.66667	2.5	2.16667	1.8	1.4	2.4	44	46	42	11	1
73	2	49	8	17	1	19	14	21	8	5	6	2	2	5	21	34	37	91	98	95	43	48	49	49	47	48	4	4.25	4.5	3.75	3.75	3.75	3	2.5	2.25	1.4	2.2	2	1.83333	1.66667	1.33333	2.2	2.4	2	33	37	35	10	1
79	2	49	9	17	1	14	19		4	4		8	4		26	36		91	78		45	46	37	41			3.5	3.75		4	3.5		3	3		2	2		1.66667	1.83333		2.4	1.8		25	29		16	1
81	2	40	10	16	1	22	9	12	6	2	3	2	4	4	20	36	35	67	67	74	25	42	27	40	34	40	2	1.5	1.5	1.75	1.5	2	2.25	2.25	2.5	1.8	1.8	1.6	3.5	2.5	2.5	1.6	2.8	1.6	28	21	23	4	1
88	2	36	8	18	1	21	19	18	4	4	3	1	1	1	13	26	24	66	67	71	38	28	34	33	38	33	2.75	2.75	2.25	2.25	2.75	2.25	2.75	2	2	1.8	2	2	1.5	1.33333	1.33333	1	1	1	37	31	32	6	1
89	1	30	12	15	1	25		11	16		14	13		13	39		52	84		71	43	41			36	35	3.75		3.5	4.25		3.5	3.25		2.5	2		2	4.16667		4.16667	4		3.8	41		35	4	1
96	2	28	9	16	1	18	11	13	11	3	8	7	4	5	21	32	32	69	63	72	34	35	32	31	36	36	2.25	2	3.25	2	2	3	1.25	1.5	1.5	1	1	1	2.16667	1	1.16667	2.8	3	2.2	44	46	49	8	1
98	2	53	4	13	1	24	6	20	7	7	9	13	8	10	23	43	46	83	70	83	41	42	33	37	37	46	3.75	2.75	3.5	3.5	3.25	3.25	4.5	4.5	4.75	2.8	2.2	3	2.5	2.5	2.5	3.4	3.2	4	29	33	26	9	1
100	2	47	7	17	1	28	29	29	2	3	1	2	2	1	0	15	15	100	90	90	50	50	42	48	40	50	4.75	4	4	2	2.5	1	5	5	5	3	2.8	5	2.16667	4.33333	3.66667	1.8	1.8	1	30	25	29	6	1
101	2	35	3	16	2	28	29	31	13	12	14	14	15	14	40	52	57	91	89	92	43	48	40	49	44	48	4.75	4.5	4.5	4.25	4.25	4.25	3.75	4.25	4	3.4	4.2	4	4.66667	4.5	4.83333	4.6	4.6	5	13	15	10	6	1
108	1	56	25	12	1	25	6	4	14	7	5	11	2	5	38	42	48	85	60	58	40	45	27	33	27	31	4.25	1.75	2	3.5	1.25	3	4.75	4.5	4.75	2.2	2.2	2.6	2.66667	2.16667	1.83333	3	1.4	1.2	29	27	29	1	1
109	2	50	3	17	1	8	31	27	1	4	1	4	6	2	27	60	45	88	95	93	45	43	49	46	49	44	3.75	4.5	3.25	4.25	4.75	3.75	2.5	3.25	2.75	1.2	2.2	1.8	1.83333	1.33333	1.16667	2.6	2	2.6	35	29	34	8	1
112	2	39	22	12	1	32	27	30	10	14	11	5	5	6	43	63	67	98	92	86	49	49	46	46	44	42	5	5	4.5	5	5	5	3	3.25	3.25	3.8	3.8	2.8	1.16667	2	1.5	2.4	3.8	1.4	32	35	29	12	1
114	2	39	4	13	1	30	19	22	13	11	13	9	8	8	31	51	53	76	66	74	38	38	32	34	37	37	3.75	3.5	3.75	4	3.25	3.75	2.5	2.5	3.75	2.4	2.2	2.8	2.33333	2.5	2.83333	2.8	3.8	3.6	30	29	19	12	1
115	2	53	15	16	1	25	14	13	7	10	7	9	9	10	31	48	45	88	97	88	45	43	49	48	47	41	4.25	4.25	3.75	4.5	4.5	4	3.25	2.75	2.5	1.2	1.4	1.8	2.33333	2.16667	2.33333	2.8	2.6	2.6	35	36	39	3	1
121	2	56	22	15	2	26	14		10	14		10	12		34	52		94	83		49	45	42	41			4.25	4.25		5	4.25		4.75	4.25		4.4	4		3.5	4.66667		3.6	3.2		10	11		6	1
123	2	43	2	13	1	21	12	18	6	10	12	7	5	7	11	42	42	71	74	70	38	33	40	34	36	34	4	3.5	3.25	3.5	3.5	3.75	2.75	2.5	1.5	1.2	1.2	1.8	1	2.83333	2.66667	2.2	3.2	3	43	35	32	9	1
129	2	52	17	16	2	18	17	14	10	12	8	5	7	6	13	25	25	51	42	50	24	27	20	22	24	26	3.75	2.75	1.5	2.25	2.5	2	1.75	1.5	1.5	1	1	1	2.33333	2.66667	2.83333	2	2.8	2.2	29	31	38	12	1
137	2	30	3	9	1	25			12			9			28			79			39	40					4.25			4.25			3.25			1.4			3.16667			3.4			26			1	1
139	2	43	14	13	1	23	21	27	7	8	9	9	12	12	28	41	43	76	71	73	35	41	33	38	33	40	3.25	3.5	3.5	3	2.75	3.75	2.5	2	3.25	2.4	2.4	2.8	1.83333	2.33333	3	1.4	3	3.4	35	33	30	15	1
140	1	47	12	18	1	14	19	16	2	3	1	4	3	2	3	21	22	56	58	63	12	44	13	45	18	45	2.5	2	1.5	1	1.25	1.5	5	5	5	4	4.2	3.6	4	4.33333	4	2.4	1.6	1.8	37	44	38	1	1
145	1	55	5	13	1	22	21	6	12	10	7	7	6	5	26	32	36	75	72	70	41	34	38	34	36	34	3.75	2.5	2.25	3.5	2.5	2.75	1.25	1.25	1.25	1	1.2	1.2	3.33333	2.33333	1.83333	3	2	2	33	34	38	1	1
147	2	42	16	13	1	29		18	8		5	6		5	27		45	83		69	39	44			35	34	4		3.75	4		3.25	3.5		2.5	2.2		1.8	3.33333		1.66667	2.6		2.2	34		38	3	1
148	2	53	23	14	2	22	21	18	13	9	12	6	4	6	22	44	37	81	73	86	38	43	34	39	40	46	4.5	4	4.5	3.75	3.5	3.75	2.25	1.75	2.25	1	1	1	1.83333	1.33333	1.66667	3.2	2.4	3	38	41	40	10	1
156	1	34	4	18	1	21	12	10	8	5	7	5	5	6	11	23	26	51	47	55	22	29	18	29	23	32	1.5	1.75	1.5	1.25	1.5	1.25	1	1	1	1	1	1	3.5	3	3.66667	2.4	2	1.6	48	50	47	2	1
158	1	38	17	16	1	11	11		15	11		13	9		21	41		93	89		47	46	44	45			4.75	4		4	4		2	2		1.8	1.4		4.66667	4.66667		3.8	3.4		29	24		1	1
163	1	58	10	13	1	16	8		8	5		8	7		26	41		76	69		34	42	33	36			3.25	3.25		2	3		4.25	5		2.2	1.8		1.5	1.83333		2.8	2.6		31	36		1	1
167	1	64	11	18	1	21	15	20	9	9	8	10	10	6	27	44	39	76	74	71	36	40	38	36	34	37	2.75	2.75	3	3.25	3.75	2.75	3.75	3.75	3.25	2.4	2.2	1.8	2.5	2	2.33333	4	3.4	3	25	25	34	1	1
171	1	42	12	16	1	29	26	22	12	10	6	12	8	6	27	39	40	82	87	82	41	41	45	42	41	41	4.25	2.75	3.25	3.5	3	4.25	2.75	1.5	2.5	1.6	1.2	1.4	3.83333	3.5	3.83333	3.8	3.2	2.2	31	38	34	10	1
175	1	58	23	16	2	18	16	11	9	8	8	9	8	9	30	40	41	75	75	60	38	37	39	36	30	30	3.5	3.75	3.5	4.5	4.5	3.5	5	4.75	4.75	4.4	4	3.4	1.83333	1.66667	2	2.8	3.6	3	10	11	23	1	1
180	1	40	3	13	1	25	3	10	8	6	8	6	2	2	30	29	36	92	43	60	46	46	22	21	30	30	4	1.5	1.75	3.75	1.25	2.25	3.25	1.5	1.75	1.4	1	1	2.5	2.16667	2.33333	2.6	1.4	1.8	35	50	42	6	1
184	1	50	5	18	1	11	11	9	6	4	6	2	3	2	13	21	27	65	48	46	26	39	18	30	17	29	2.25	1.75	2	2	1.5	1.5	4.5	3.5	3	2.8	2.2	2.8	1.66667	1.83333	1.33333	2.2	1.6	1.4	45	44	48	6	1
186	1	45	8	13	1	27	25	28	4	11	6	4	8	6	27	52	46	76	91	95	37	39	44	47	48	47	4.25	3.75	4.5	3.25	3.5	3.75	2.75	3.25	2.5	1.8	1.6	1.6	1.16667	1.83333	1.83333	2	2.2	3.2	39	43	38	12	1
187	2	36	19	18	1	24	28	30	12	19	19	8	15	18	52	65	62	87	88	76	41	46	45	43	35	41	4	4.25	4.5	4	4	3.75	2.75	3	3.75	2	3.6	4.6	3.5	3.5	3.83333	3	4.4	5	37	15	6	16	1
189	1	53	7	13	1	31			8			6			37			91			45	46					4.25			4.25			5			4.8			2			3			6			1	1
199	2	44	6	13	1	21	12	11	2	2	1	1	1	1	13	30	23	60	57	60	29	31	27	30	28	32	2.75	2.25	1.5	2	1.75	2	2.5	1.5	1.5	1.2	1.2	1	1.66667	1.5	2	1.8	2	1.2	37	39	38	2	1
202	1	33	9	13	1	20			8			8			47			89			49	40					4.75			5			3.25			2			1.5			4.4			24			1	1
205	1	30	2	18	1	13	8	8	8	11		6	4		22	36		62	55		29	33	25	30			2.75	2.25		1.75	1.75		1	1		1	1		1.83333	2.5		3.4	3.8		44	45		8	1
213	1	55	1	14	1	11	14	15	9	7	8	8	9	9	22	40	41	82	98	85	39	43	48	50	41	44	4.75	4.75	3.75	4	4	3.5	3.5	4	4.25	2.4	3.2	2.6	2.66667	2.66667	2.33333	3.6	3.6	3.2	29	26	25	1	1
217	1	45	12	13	1	15	9	8	12	8	8	16	13	12	23	36	37	82	65	65	38	44	30	35	29	36	4	2.75	3.25	2.75	2.25	1.75	2.75	1.75	2	1.2	1	1	3.33333	3	2.83333	3.4	2.6	2.8	28	29	29	9	1
220	1	54	13	13	1	21			12			12			24			74			38	36					2.75			2.5			2.25			1.2			2.66667			3.2			26			10	1
228	2	49	3	17	1	18	22	20	7	6	5	2	4	3	27	37	29	94	95	94	46	48	47	48	47	47	4.25	4.25	3.25	4.25	4.5	3.5	2.75	2.5	2.75	2.2	1.8	2	1.83333	2.33333	2.16667	2.2	3.2	2.4	41	45	42	16	1
236	2	42	3	16	1	22	18	11	8	11	9	10	13	10	24	42	39	76	66	68	37	39	32	34	33	35	4.5	3.75	3.5	3.5	3.75	3.5	3	3.25	2.5	1.8	1.4	1.6	3.66667	3.5	3.83333	2.8	3.4	1.8	38	36	34	16	1
237	2	54	28	16	2	13	11	11	2	4	2	8	7	7	19	37	35	80	89	75	36	44	43	46	33	42	4	3.5	3.75	2.75	2	3	4.75	4.5	4.75	4.6	4.6	4.6	1.33333	2.33333	2	2	2.4	2	5	4	6	1	1
238	1	38	4	13	2	22	1	1	7	3	4	6	3	3	19	40	32	98	96	78	49	49	50	46	38	40	2.5	2.5	2.25	2.5	3.5	2.25	2	2.25	1.25	1.4	1.2	1	1.83333	1.33333	1.66667	2.6	1.4	1.2	34	46	39	8	1
246	1	34	0.5	16	2	14			6			1			12			59			30	29					1.75			2.5			1.75			1.8			1.66667			1.2			41			3	1
249	1	35	17	18	1	22	18	9	6	8	4	7	9	7	26	42	44	79	75	66	37	42	34	41	31	35	1.5	3	2.75	3.75	3.25	2.25	2.25	3.25	2.25	2.6	1.8	1.6	2.66667	4	2.33333	2	3.2	2.4	29	25	21	2	1
250	1	36	3	12	1	24	4	0	5	5	1	2	3	1	17	31	31	56	37	35	28	28	18	19	17	18	2.5	1.75	2	3	1.5	2	1.25	1	1	1	1	1	1.16667	1	1.16667	2	1.6	1.2	46	45	52	2	1
251	2	48	13	12	1	11	11	18	3	2	0	5	3	4	32	38	50	93	86	83	48	45	44	42	44	39	4.5	3.5	5	4	3.25	4.5	2.5	2.25	3.75	2.2	2	1.8	2.33333	2	2.5	1	1.2	1.6	39	37	35	8	1
253	2	42	5	16	1	23	18		11	10		6	4		37	51		74	84		35	39	43	41			4	3.75		4	4		4.25	3.25		1.4	1.6		1.66667	2.33333		1.8	1.8		33	36		10	1
257	2	49	20	15	1	19	18	23	7	4	6	4	4	2	31	44	38	78	73	63	37	41	33	40	29	34	4.25	4	4	4	4.25	4	3	2.75	3.5	3	2.6	3.2	3.5	3	2.5	1	1.2	1	23	28	22	1	1
266	1	41	8	13	1	21			2			3			24			80			39	41					3.75			3.25			4.25			2.6			1.5			2.2			22			8	1
274	2	47	18	13	2	14			6			12			20			78			33	45					3			2.75			3.25			2.2			3.5			2.8			28			3	1
275	2	34	7	12	1	24	13		0	4		4	6		32	50		84	78		39	45	34	44			4.5	4.25		3.25	3.75		2.75	3.75		2.2	3		1.5	3		1.4	2.6		29	20		16	1
276	1	47	10	16	1	20	9	8	3	3	4	2	2	1	18	37	33	72	69	64	34	38	33	36	29	35	3.75	3.5	3	3	2.5	2.25	2.25	2.25	1.75	1.6	1.8	1.6	2	1	1	1.8	1.6	1.6	40	34	45	3	1
278	2	50	5	13	1	20	25	14	12	10	12	9	11	9	34	49	41	85	94	69	40	45	46	48	31	38	4.25	3	3	4.25	4.25	3.25	3.5	4	3	3	2.8	2	2.66667	2.83333	2.66667	2.8	2	2.2	36	34	43	6	1
287	1	27	2	13	2	24			10			8			35			63			33	30					2.75			4			1.75			1.6			2.66667			1.6			28			8	1
292	1	36	6	12	1	17	9		10	6		5	3		13	19		72	72		26	46	30	42			3.75	3.5		1.25	1		3.75	3.75		1.2	1		2	1.33333		2.2	1.4		13	34		2	1
294	2	42	19	13	1	21			9			3			30			73			38	35					4.5			3.75			2			1.4			2.33333			1			36			1	1
295	2	48	12	15	2	26	21	11	12	12	11	16	16	14	34	55	58	82	82	89	43	39	44	38	46	43	5	4.25	4.75	4.75	4.75	4.5	1.75	2	2.25	2	1.8	2.2	3.5	3.66667	3.5	3.8	3.8	4	36	34	38	2	1
296	2	50	26	17	1	14	15	16	4	1	2	3	1	2	5	17	27	62	63	56	25	37	26	37	23	33	2.75	2.75	3.25	1.5	1	1	5	5	4.75	1.4	1.6	1.8	1.16667	2	1.83333	1.4	1.4	1.2	39	38	39	10	1
298	1	60	21	12	2	25			5			11			16			89			40	49					4.5			2.5			4.5			3.2			3.33333			2.8			19			1	1
299	2	54	16	14	1	17	17	20	11	13	13	10	12	12	38	49	48	89	81	81	48	41	45	36	40	41	3.75	3.5	3.75	4.5	3.75	4.75	2.25	2.5	2.75	1.8	2	2	4.5	4	3.66667	3	3.4	3.2	34	27	38	1	1
312	2	47	7	16	2	21	15	16	10	6	13	8	7	11	25	33	33	72	70	79	37	35	35	35	43	36	2.75	2.25	2.75	3.5	3	4.25	2	2.25	2.75	1.4	1.4	1.8	1.66667	1.33333	1.83333	1.8	2.4	2	40	38	33	10	1
315	1	18	3	10	2	18			6			4			25			73			33	40					2.75			2.75			2.75			1.2			2.16667			2.2			35			8	1
317	1	60	21	18	2	16	11	17	1	3	1	3	2	2	11	27	27	64	70	62	27	37	30	40	24	38	2.75	2.5	2.75	2	2	2	2.5	3.25	3.25	1.6	1.8	1.8	1.33333	1.5	1.33333	3.6	1.4	1.2	33	32	26	1	1
319	2	42	21	18	1	13			3			1			25			76			35	41					4.25			2			3.75			2			2			1			28			10	1
320	2	38	4	15	1	27			7			9			31			83			47	36					3.5			4.25			2.75			1.2			2.16667			2.6			38			8	1
326	1	44	12	13	1	24	21	19	10	6	8	11	9	10	22	37	36	80	67	69	38	42	37	30	34	35	3.75	1.75	2.25	3.5	2	3.5	2.75	2.25	2.25	2	1.2	1.2	3	2	2	4	2.6	2.8	34	31	40	2	1
328	1	25	3	16	1	26			13			7			15			86			44	42					4.25			3			4			1.4			2			3			40			6	1
330	1	39	15	8	1	11			20			11			27			73			39	34					1			4.25			2.5			1.4			2			2.8			39			8	1
341	2	50	28	18	2	18	12	11	6	8	7	6	8	6	29	43	38	74	69	71	37	37	32	37	34	37	3.25	3	2.75	3.5	3.75	3.25	2.25	2.75	3	1.2	2.2	1.6	1.33333	2.33333	2.16667	1.8	2.4	2	35	36	35	9	1
342	1	35	2	13	1	27	11	12	5	5	4	8	8	5	35	53	52	91	81	76	48	43	46	35	42	34	4.75	3.25	3.5	3.75	4.25	4.5	2	1.5	1.5	1.6	1.2	1.2	2.83333	3.33333	2.5	3	2.4	1.6	28	27	29	12	1
346	1	37	10	16	1	17	22	6	6	5	8	1	1	1	13	27	24	72	74	71	34	38	35	39	31	40	3.75	3.75	2.75	2	1.5	1.5	2.5	2.25	1.5	1.2	1	1	1.33333	1.16667	1.16667	1.6	1.4	1	43	42	45	1	1
349	2	32	8	16	1	21	22	23	9	9	13	7	13	11	36	53	53	83	90	82	43	40	45	45	39	43	5	4.25	4	3.75	4	3.25	3.5	4.25	3	2.4	2.4	2.2	4	4	3.5	2.6	3	3.2	31	29	27	1	1
352	1	53	4	17	1	21			7			8			22			70			29	41					3.25			2.25			3			1.6			3			3.2			34			6	1
353	1	30	4	12	1	20			6			9			13			63			29	34					2.75			1.75			2.75			1.6			2.16667			3			27			4	1
367	1	50	18	18	1	25	17	18	5	4	5	6	6	7	14	28	33	65	61	63	18	47	14	47	18	45	4.25	4.25	4.25	1.5	1.25	1.5	5	5	5	2.4	2.6	2.4	2.83333	2.33333	2.16667	3.8	3.4	3.4	30	29	32	1	1
369	1	30	5	16	2	21	6	3	2	2	2	1	2	0	15	22	22	58	40	27	30	28	21	19	15	12	3.5	1.75	1.75	2.5	1.5	1.25	1.5	1.5	1.25	1.2	1.2	1.2	3	1.5	2	2	1	1	41	44	50	2	1
372	1	35	7	13	1	30			14			10			35			89			45	44					4.75			3.75			4			1.6			2.16667			4.6			28			3	1
373	1	27	9	13	1	23	11	20	5	3	4	10	5	3	38	34	63	83	55	69	38	45	31	24	37	32	4.5	1.75	3.25	4.5	3	4	4.5	2.75	2.75	2.4	2	2.2	3.16667	1.33333	1.66667	3	2	2.2	26	33	34	16	1
381	2	29	5	15	1	22	12	24	10	9	8	4	6	6	24	30	40	59	56	72	32	27	29	27	36	36	3.75	2	4.5	2.25	2.25	4	1.5	1	1.5	1	1	1.2	1.5	1.66667	1.16667	3.6	3	2.6	32	37	36	3	1
382	2	32	0.5	17	1	27	20	3	3	2	3	6	2	1	29	46	45	81	84	84	38	43	41	43	38	46	4	4	2.75	3.75	4	2.25	2.25	3.5	2.75	1.8	1.8	2.2	3.16667	2.5	1.33333	1.6	1.6	1.4	30	27	36	10	1
385	1	47	20	17	1	25	24	18	1	4	3	4	5	5	21	35	31	62	63	65	31	31	29	34	32	33	3.25	3	2.25	3.25	3	2.25	1.25	2.5	1.5	2	2	1.6	1	1.66667	2	1.2	1.4	1.6	37	45	45	1	1
388	2	37	9	12	1	16	12	14	5	3	6	4	3	3	30	37	38	73	72	73	37	36	36	36	37	36	3.75	4	3.25	3.5	3.5	2.25	3	2.25	2	1.8	2	1.2	1.33333	1.33333	1.33333	2.2	2.4	2	34	37	38	8	1
391	2	34	4	13	1	22	22	23	9	8	12	2	3	3	30	43	47	68	81	72	35	33	41	40	38	34	3.75	3.5	4	3.25	3.25	3.75	2	2.5	1.5	1.2	1.2	1.2	2.66667	2.66667	2.66667	2.2	2.2	2.6	37	36	38	10	1
392	1	31	2	15	2	25	11		18			10			39			76			40	36					3.5			4			2.25			2.2			2.66667			3.4			27			16	1
393	1	33	11	18	1	13			7			7			27			73			33	40					2.25			2.5			4			1.6			2.83333			2.6			33			12	1
396	1	28	5	16	1	27	15	22	16	15	14	8	6	6	30	43	41	84	69	75	44	40	34	35	35	40	3.75	2.75	4	3.75	4	3	3	3.5	3.5	2.2	1.8	2	4.83333	4.83333	4.33333	4.2	3.6	4	25	26	29	12	1
399	2	18	2	16	1	27			7			11			37			87			46	41					4.5			4.75			2.5			2.4			3.33333			4.4			35			2	1
406	2	43	8	18	2	23	18	18	8	10	9	4	4	3	14	42	33	66	69	69	30	36	32	37	33	36	3	4.25	3	1.75	3.5	3	4	4	3.75	2.4	2.8	2.2	1.66667	2.66667	2.16667	2	2.2	2	26	21	22	8	1
409	2	37	5	15	1	24	19	10	12	13	11	5	3	1	23	31	33	81	81	73	40	41	43	38	36	37	4.75	4.5	2.25	4.5	3.5	2	1	1	1	1	1	1	2.33333	2.33333	2.33333	3.2	2.2	1.8	39	38	44	12	1
410	1	29	2	13	2	25	3	9	2	1	1	2	1	2	25	32	33	78	51	57	40	38	29	22	31	26	4.25	2.25	3.25	4.75	3	4	1.25	1.25	1.25	1	1	1	2.33333	1.66667	2.83333	1.4	1.4	1.6	33	32	31	6	1
412	2	47	7	12	2	23			2			5			28			87			43	44					3.5			3.75			4.75			4.2			2.33333			2.4			14			8	1
421	1	49	8	13	1	19	20	20	7	9	11	5	5	8	21	36	36	80	81	87	37	43	38	43	42	45	3	2.5	4	2.5	3	3	1.75	2.25	2.25	1.8	1.8	2	1.16667	1.5	2.16667	2.4	2.6	2.8	45	41	41	1	1
424	2	40	17	17	1	28	25	24	0	1	1	4	3	6	21	31	35	76	72	73	33	43	30	42	29	44	3.75	4	4	3.5	3.75	3.25	4.5	5	4.5	3.2	3.2	3.6	1.83333	2.5	2.83333	1.6	1.8	2	27	29	28	2	1
430	1	50	32	17	1	20	15	12	5	6	4	9	12	9	35	50	46	87	84	86	43	44	42	42	44	42	4.25	3.75	3.5	4.5	3.5	4	3.25	3.5	3.25	1.4	1.8	2.4	2.5	3	2.83333	2.4	2.4	2.4	28	33	32	4	1
431	1	23	5	13	1	27	25	23	12	10	10	1	2	6	15	29	38	67	71	64	33	34	39	32	34	30	3	3.25	3	3.5	3.25	3.5	2.25	2	2.25	1.2	1	1	1.16667	1.5	1.16667	2	1.6	1.4	47	34	42	12	1
433	1	46	5	12	1	27	12	15	7	8	7	10	9	9	19	42	41	83	89	91	37	46	44	45	43	48	3.75	4	4.5	3.75	4	3.75	3.25	3.25	3.75	2.2	3.2	3.2	4	2.66667	3.83333	3.4	3.4	3.2	19	21	25	4	1
435	1	34	14	15	1	22	19		6	7		7	11		17	41		80	69		39	41	36	33			4.5	3.5		4.75	4.25		2.5	2.25		2	1.4		2.5	2.83333		3.6	4.6		24	19		1	1
436	1	18	6	13	1	19	14	19	5	5	4	4	3	3	21	33	29	86	81	74	43	43	40	41	34	40	3.5	3.25	3.75	2.75	2.75	1.75	4.25	3.75	3.75	1.6	2	1.4	1.33333	1.16667	1.5	2	2.2	1.6	41	44	38	16	1
438	2	28	2	13	1	21	20	18	12	10	10	7	5	6	17	32	28	63	61	54	24	39	22	39	22	32	2.75	3	2.5	2	1.5	2	3.25	2.5	3	2	2	1.8	2.5	2	2.16667	3.8	3.2	3	26	34	31	6	1
439	2	38	2	14	1	18	16	13	3	3	1	1	1	3	10	25	28	52	41	43	30	22	19	22	24	19	2.75	2.25	2.5	2.25	1.75	2.75	1.25	1.25	1.5	1	1	1	2.5	2.16667	2.16667	1.4	1.2	1.4	47	47	46	1	1
442	1	37	0.5	17	2	17	16	17	3	6	6	3	2	1	25	32	30	43	55	42	16	27	23	32	17	25	1.75	2.25	1.75	1.75	1.75	1	2	1.5	1.75	1.2	1	1.2	2	1.5	1	2	2	1.4	38	32	34	8	1
443	2	36	12	17	1	22			7			5			30			88			47	41					4.75			5			3.25			2.2			1.16667			1.2			25			12	1
449	1	48	2	14	1	29	18	11	13	10	11	15	13	14	24	38	35	97	80	79	47	50	34	46	38	41	5	4.5	4	4	3.5	3.25	2.25	2.5	2.5	1.8	2	1.8	3.33333	4	3.16667	4.2	4.4	4.2	28	32	37	8	1
451	2	46	13	16	1	27			15			14			35			80			41	39					4.25			3.75			3			2			4			3.6			26			2	1
455	2	37	3	16	1	22	19	12	10	10	13	6	5	4	36	52	46	89	80	89	43	46	39	41	43	46	4.25	3.75	4	3.75	2.75	2.75	4	2.5	4	2.6	2	2.6	1.83333	1.66667	1	3	2.6	2.8	35	37	32	8	1
456	2	35	4	16	1	18	27	24	15	14	13	14	15	10	20	49	44	96	96	88	48	48	48	48	45	43	4.25	4.75	4.5	4	4.25	3.75	3.5	3.5	2.75	2	2.8	2.8	1.83333	2.33333	2	3.2	2.8	2	35	32	35	6	1
466	1	52	2	17	1	24	22	26	11	10	11	3	5	5	30	43	43	71	61	63	40	31	34	27	31	32	4.25	2.75	2.75	3.25	2.75	3.25	1	1.25	1	1.4	1.6	1.4	1.5	1.83333	1.66667	2	2.6	3.6	40	46	36	4	1
468	1	18	0.5	12	1	17	6	11	9	8	9	4	4	5	23	34	34	68	56	69	33	35	28	28	32	37	2.25	1.5	3	1.5	2	2.5	1	1.25	1	1	1	1	1.16667	1.33333	2.33333	2.6	1.4	2	44	38	32	2	1
472	2	32	2	16	1	15	19	21	7	8	5	6	5	4	13	29	21	70	69	65	35	35	33	36	31	34	4	4	4.5	1.75	2	2	1.25	1.25	2	1.2	1	1	2.5	2.33333	2.16667	4	3	3.4	46	41	50	10	1
477	2	36	2	17	1	19	19	18	9	8	11	5	5	2	23	40	39	68	66	67	35	33	35	31	34	33	2.75	3.5	2.75	3	3.25	3	2.25	2.25	1.75	1.4	1.4	1.2	2.5	2.16667	2.16667	2.4	2.4	2.4	35	32	38	2	1
486	1	34	6	13	1	20			8			12			34			83			38	45					4			4			3.5			3			2.66667			3.4			16			16	1
497	2	34	4	16	1	23	25	20	9	13	11	13	15	16	35	48	40	83	86	77	44	39	47	39	40	37	4.5	4.25	4.25	4.25	4.75	4.25	1.5	1.5	1.25	1.2	1.2	1.2	3.83333	4.5	3.5	4.4	4	4.2	28	29	32	1	1
502	2	33	10	13	1	24	24	26	10	11	8	3	4	3	30	42	48	79	80	80	40	39	39	41	40	40	3.5	3.25	3.25	3.25	4	3	1.75	1.5	2	1.2	1.4	2	3.16667	3.5	3.16667	3.4	2.8	2.2	37	36	40	6	1
510	1	44	14	16	1	30	22	23	16	11	14	13	7	14	30	35	39	97	86	85	48	49	40	46	41	44	5	3.5	4.25	3.25	2.5	3	3	2.25	2.75	3.2	2.2	2.6	3.16667	2.83333	3.66667	3.4	2.4	3.2	27	31	31	1	1
520	2	52	3	14	1	25	22	23	4	1	3	5	4	4	28	33	40	80	75	79	39	41	36	39	40	39	2.75	2.75	2.75	2.5	2.5	3.25	2.25	1.5	3	1.6	1.4	1.8	3.5	3.5	4	2.2	2	2.2	29	30	29	1	1
522	2	26	2	13	1	27	20	20	2	4	5	1	1	3	17	38	37	78	74	74	38	40	39	35	39	35	3.5	4.25	3.25	3.25	3.5	2	1	2.75	1	1.6	1	1	2.16667	2.83333	2.16667	1	1.2	1.6	23	20	35	10	1
530	1	61	13	12	1	17			1			2			20			58			29	29					3.25			2.25			1.5			1			1.16667			1.6			34			1	1
[truncated: 1 more columns]
